# Supplementary material for: PI3K-Mediated Blimp-1 Activation Controls B Cell Selection and Homeostasis
Source: PubMed Central journal article supplement — Cell Rep. 2018 Jul 11;24(2):391–405. doi: 10.1016/j.celrep.2018.06.035 (PMC6057491; doi:10.1016/j.celrep.2018.06.035), 2018-07-11
Supplement: mmc1.pdf [file mmc1.pdf]

**Cell Reports, Volume 24**

**Supplemental Information**

**PI3K-Mediated Blimp-1 Activation**

**Controls B Cell Selection and Homeostasis**

**Corinna S. Setz, Eva Hug, Ahmad Khadour, Hend Abdelrasoul, Mayas Bilal, Elias Hobeika, and Hassan Jumaa**

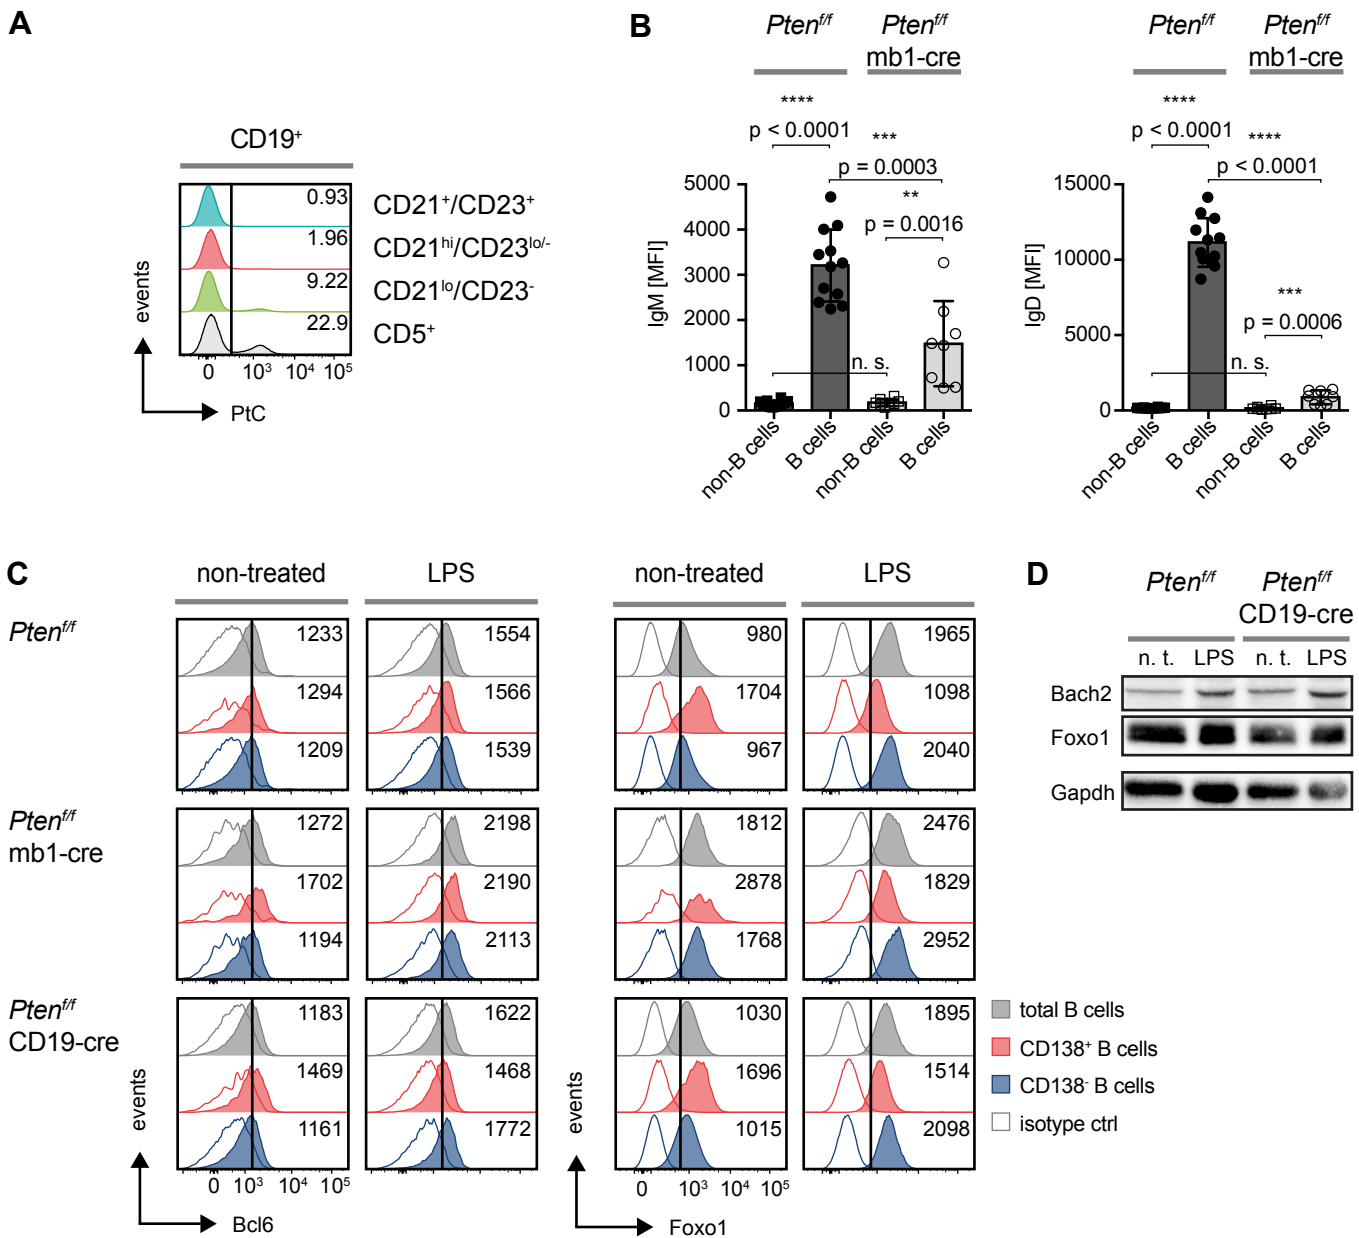

**Figure S1 | Reduced BCR Expression in *Pten*-Deficient Mice and Analysis of Transcription Factors** (related to Fig. 1 and 2)

**A** | Representative flow cytometric analysis of phosphatidylcholine (PtC)-binding in subpopulations of splenic B cells in control mice: Follicular B cells (Fo.B, CD21<sup>+</sup>/CD23<sup>+</sup>), marginal zone (MZ.B, CD21<sup>hi</sup>/CD23<sup>lo/-</sup>) and CD21<sup>lo</sup>/CD23<sup>-</sup> B cells.

**B** | Quantification of IgM (left) and IgD (right) mean fluorescence intensity (MFI) in splenic fractions of B cells and non-B cells from *Pten*<sup>fl/fl</sup> (n=12) and *Pten*<sup>fl/fl</sup> x mb1-cre mice (n=8) (mean ±SD). Average MFIs from 3 individual stainings per mouse were calculated. Statistical significance was calculated between B cells and non-B cells from the same mice by using the two-tailed paired t test, otherwise, by applying the two-tailed unpaired t test.

**C** | Intracellular flow cytometric analysis of Bcl6 (left) and Foxo1 (right) expression in splenocytes from Fig. 2A at day 3 following stimulation with 2.5 μg/ml LPS.

**D** | Immunoblot analysis of Bach2 and Foxo1 expression in splenocytes from Fig. 2A at day 3. n. t. = non-treated, Gapdh served as loading control. Data are representative of at least 2 mice per genotype.

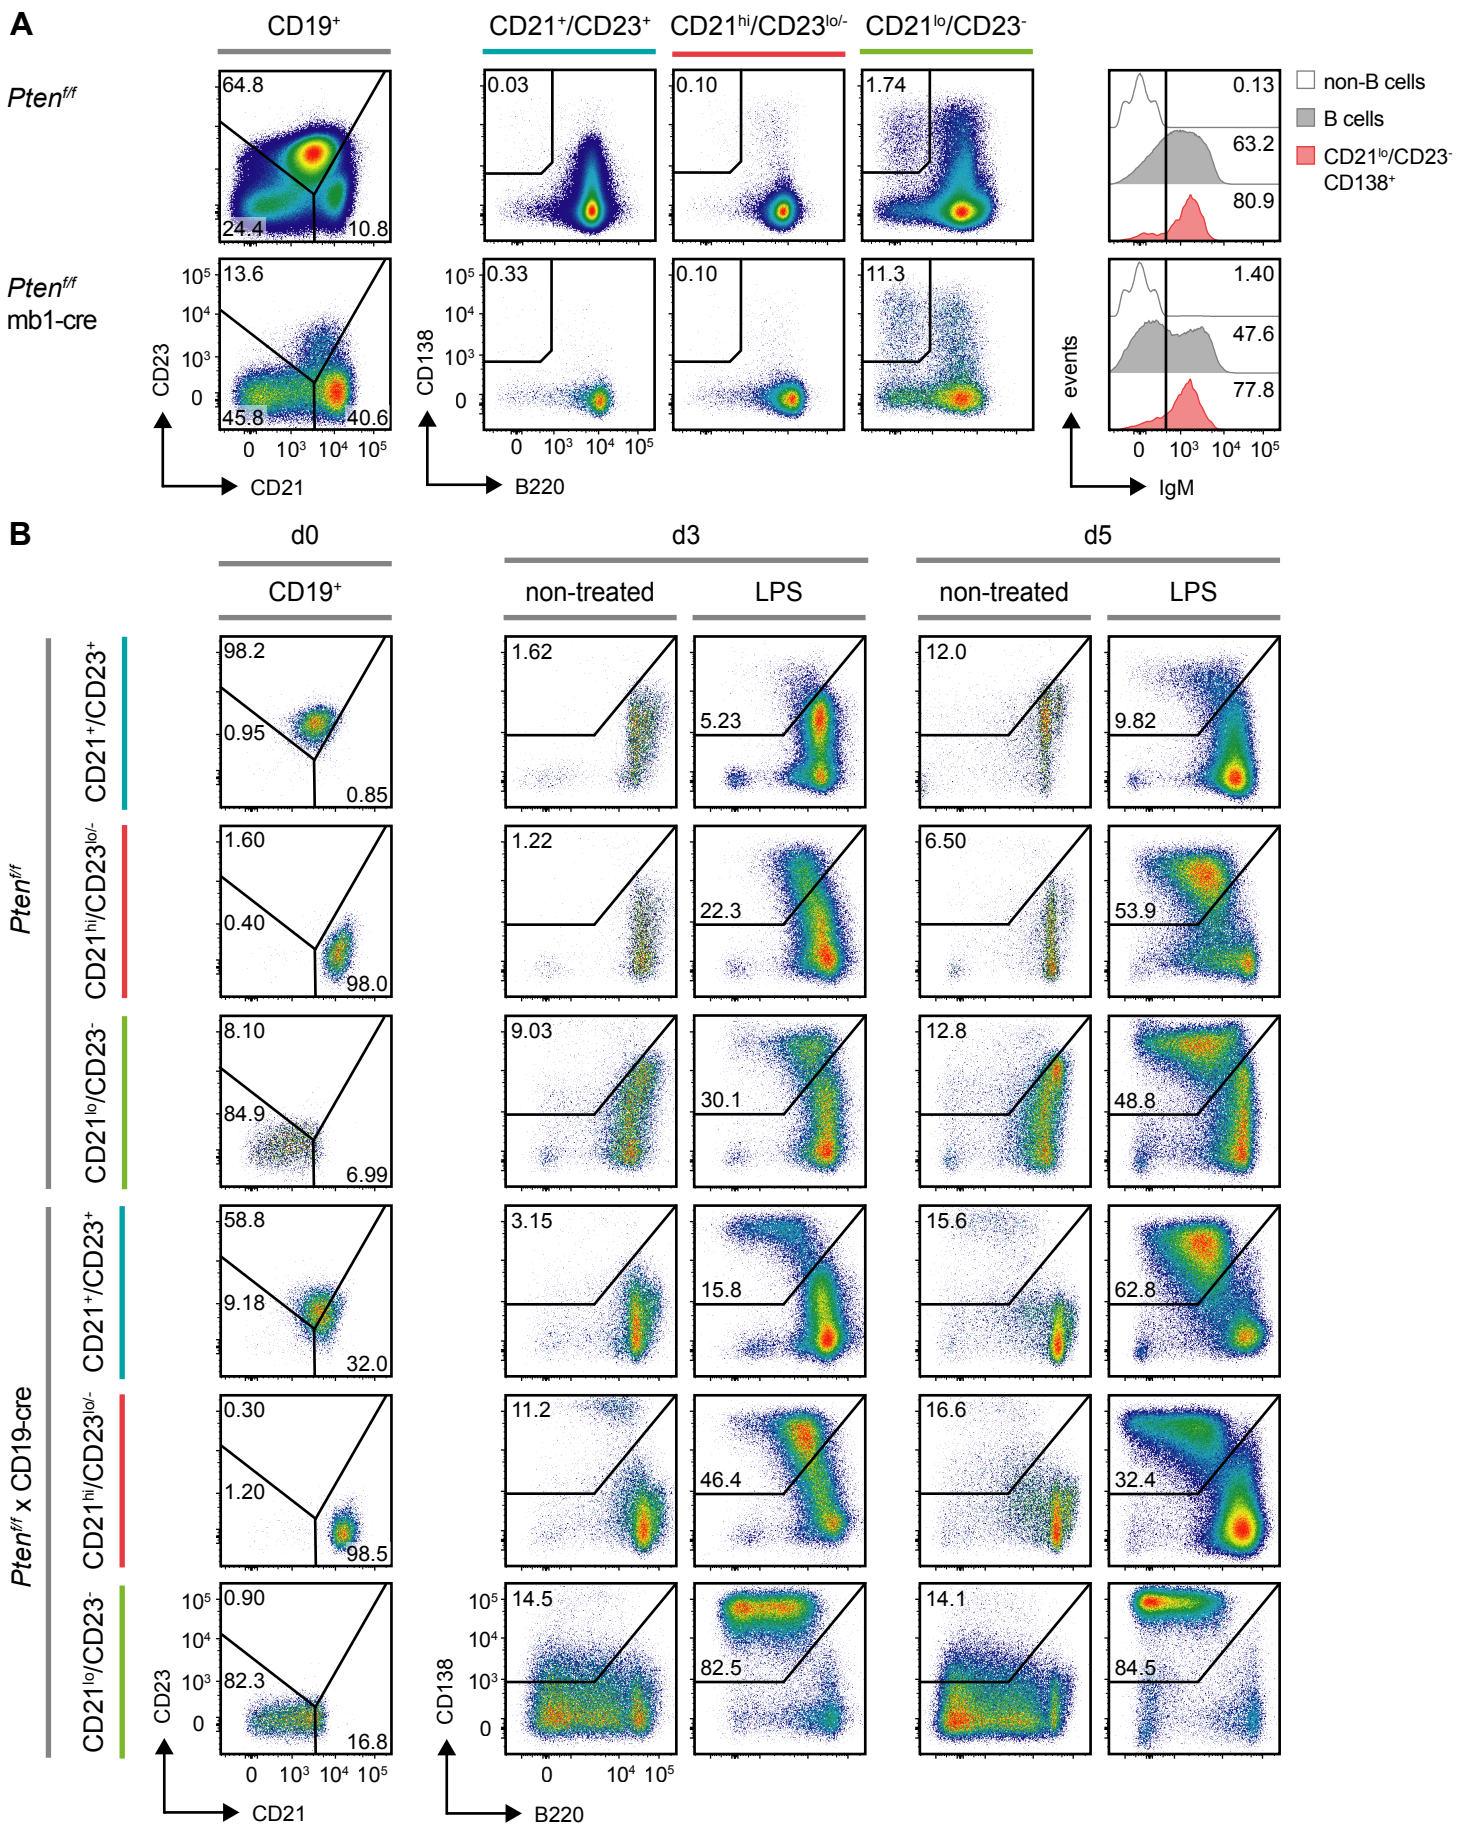

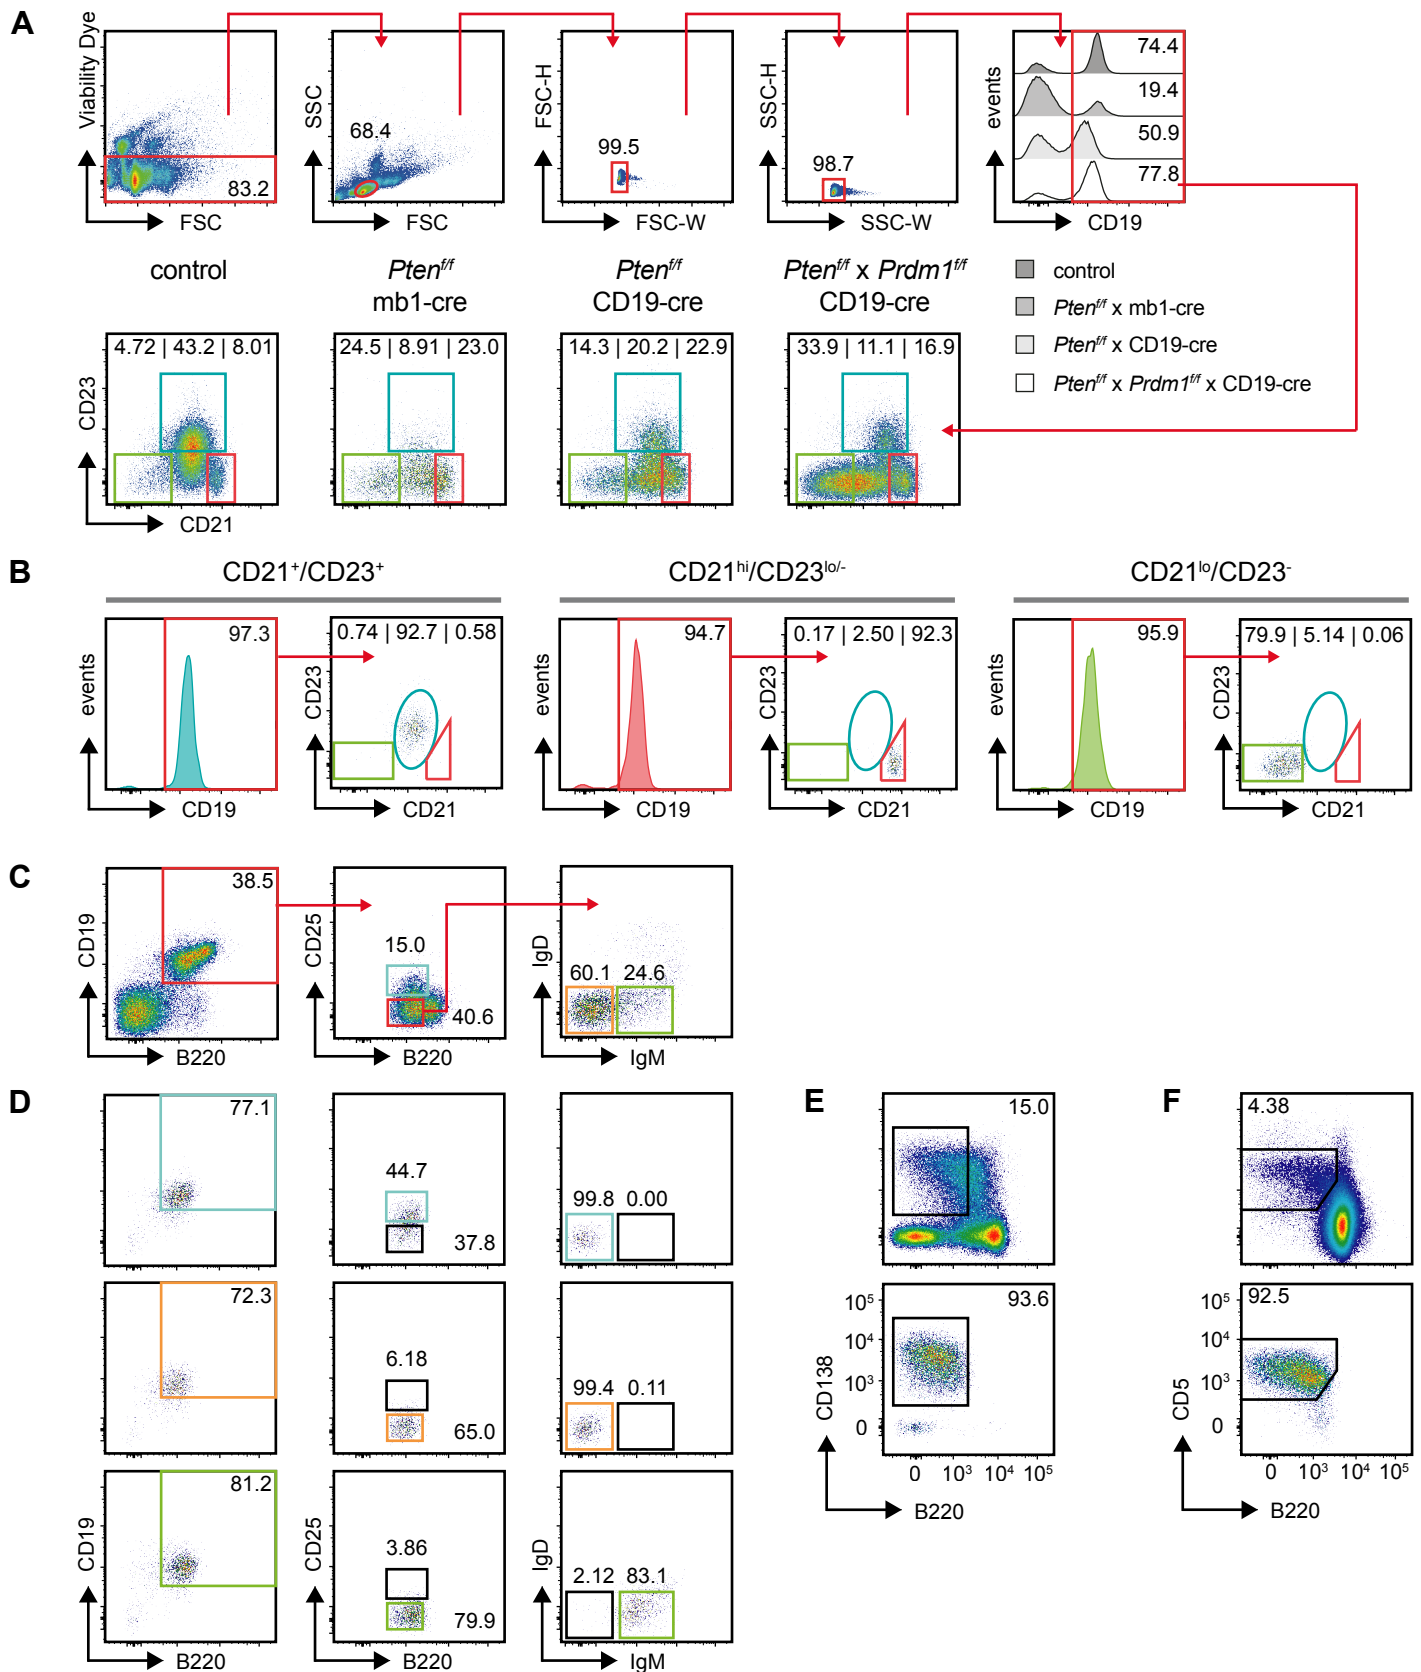

**Figure S3 | Increased Blimp-1 Expression in *Pten*-Deficient B Cells** (related to Fig. 2 and 4)

**A** | Fo.B (CD21<sup>+</sup>/CD23<sup>+</sup>, blue), MZ.B (CD21<sup>hi</sup>/CD23<sup>lo/-</sup>, red) and CD21<sup>lo</sup>/CD23<sup>-</sup> B cells, from spleens of control, *Pten<sup>ff</sup>* x mb1-cre, *Pten<sup>ff</sup>* x CD19-cre and *Pten<sup>ff</sup>* x *Prdm1<sup>ff</sup>* x CD19-cre mice were FACS-purified as illustrated by the gating strategy.

**B** | Representative re-analysis of splenic B cell populations from the control mouse, purified according to the gating strategy shown in Fig. S3A to determine the purity of the sorted populations.

**C** | Pro-B cells (CD19<sup>+</sup>/B220<sup>+</sup>/IgM<sup>-</sup>/IgD<sup>-</sup>/CD25<sup>-</sup>, orange), small pre-B cells (CD19<sup>+</sup>/B220<sup>+</sup>/IgM<sup>-</sup>/IgD<sup>-</sup>/CD25<sup>+</sup>, blue) and immature B cells (CD19<sup>+</sup>/B220<sup>+</sup>/IgM<sup>+</sup>/IgD<sup>-</sup>/CD25<sup>-</sup>, green) from control mice were FACS-purified as illustrated by the gating strategy.

**D** | Representative re-analysis of B cell populations purified according to the gating strategy shown in Fig. S3C to determine the purity of the sorted populations.

**E** | Splenocytes from wild-type mice were stimulated with 2.5  $\mu$ g/ml LPS for 5 days. B220<sup>lo</sup>/CD138<sup>+</sup> were FACS-purified (top) and subsequently re-analyzed to assess the purity (bottom).

**F** | Splenic B-1a B cells from wild-type mice (pre-gated on CD19<sup>+</sup> cells) were FACS-purified (top) and re-analyzed subsequently to assess the purity (bottom).

Dead cells and doublets were removed also during purification of populations in Fig. S3C, E and F as shown in Fig. S3A.

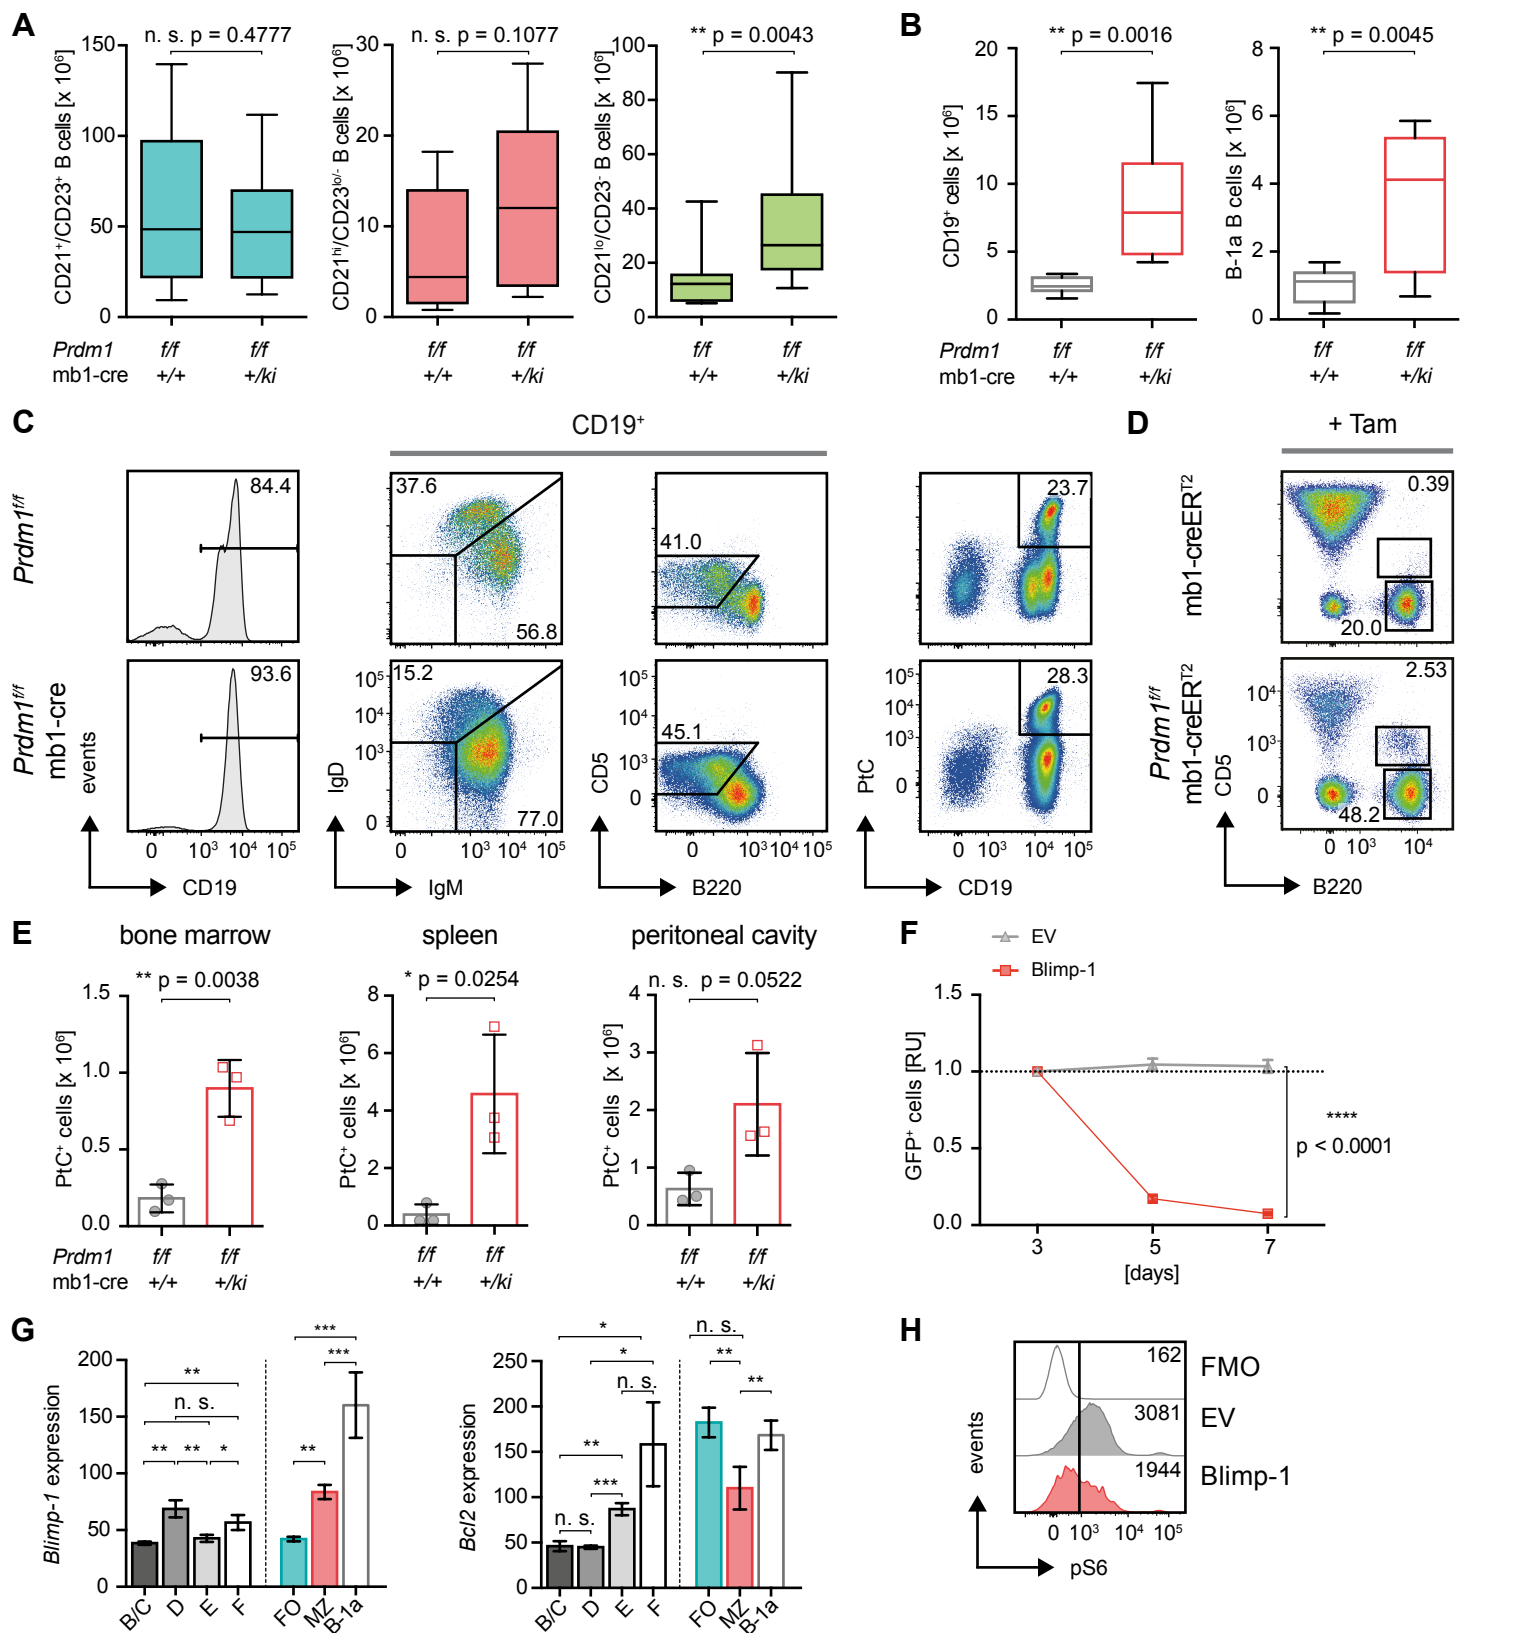

**Figure S4 | Increased Autoreactivity in *Prdm1*-Deficient B Cells** (related to Fig. 3 and 4)

**A** | Cell numbers of splenic Fo.B (blue), MZ.B (red) and CD21<sup>lo</sup>/CD23<sup>-</sup> (green) B cells from *Prdm1*<sup>f/f</sup> and *Prdm1*<sup>f/f</sup> x mb1-cre mice (n=14, median ±quartile and range).

**B** | Absolute numbers of total B cells and B-1a B cells in peritoneal cavities from *Prdm1*<sup>f/f</sup> and *Prdm1*<sup>f/f</sup> x mb1-cre mice (n=8, median ±quartile and range).

**C** | Representative flow cytometric analyses of peritoneal cavity lavages from *Prdm1*<sup>f/f</sup> and *Prdm1*<sup>f/f</sup> x mb1-cre mice for surface expression of the indicated markers and binding of phosphatidylcholine (PtC).

**D** | Representative flow cytometric analysis of peripheral blood cells from mice of the indicated genotypes 6 months after inducible deletion of *Prdm1* by tamoxifen (+ Tam) administration (bottom). Mice expressing mb1-cre-ER<sup>T2</sup> in absence of floxed alleles (top) treated with tamoxifen served as control. Shown data are representative for at least 2 individual mice per genotype.

**E** | Numbers of PtC-reactive B cells in bone marrow, spleens and peritoneal cavities from mice of the indicated genotypes (n=3, mean ±SD).

**F** | Survival of *Rag2/λ5* double knock-out (DKO) pro-B cells upon ectopic overexpression of Blimp-1 or the empty vector (EV). Percentages of viable GFP<sup>+</sup> cells at days 5 and 7 were normalized to the percentages measured at day 3 after transduction (n=6, mean ±SD).

**G** | Analysis of published microarray data on gene expression of *Blimp-1* (left) and *Bcl2* (right) in Hardy fractions B/C (pro), D (pre), E (newly formed) and F (recirculating B cells) compared to expression in Fo.B, MZ.B and B1-a B cells of the murine spleen (n=3 ±SD).

**H** | Measurement of mTor activity by pS6 content via FACS in *Rag2/λ5* DKO pro-B cells at day 3 upon retroviral transduction with an expression vector encoding Blimp-1 or the EV, respectively. Untransduced cells unstained for pS6 (FMO, fluorescence minus one) served as control.

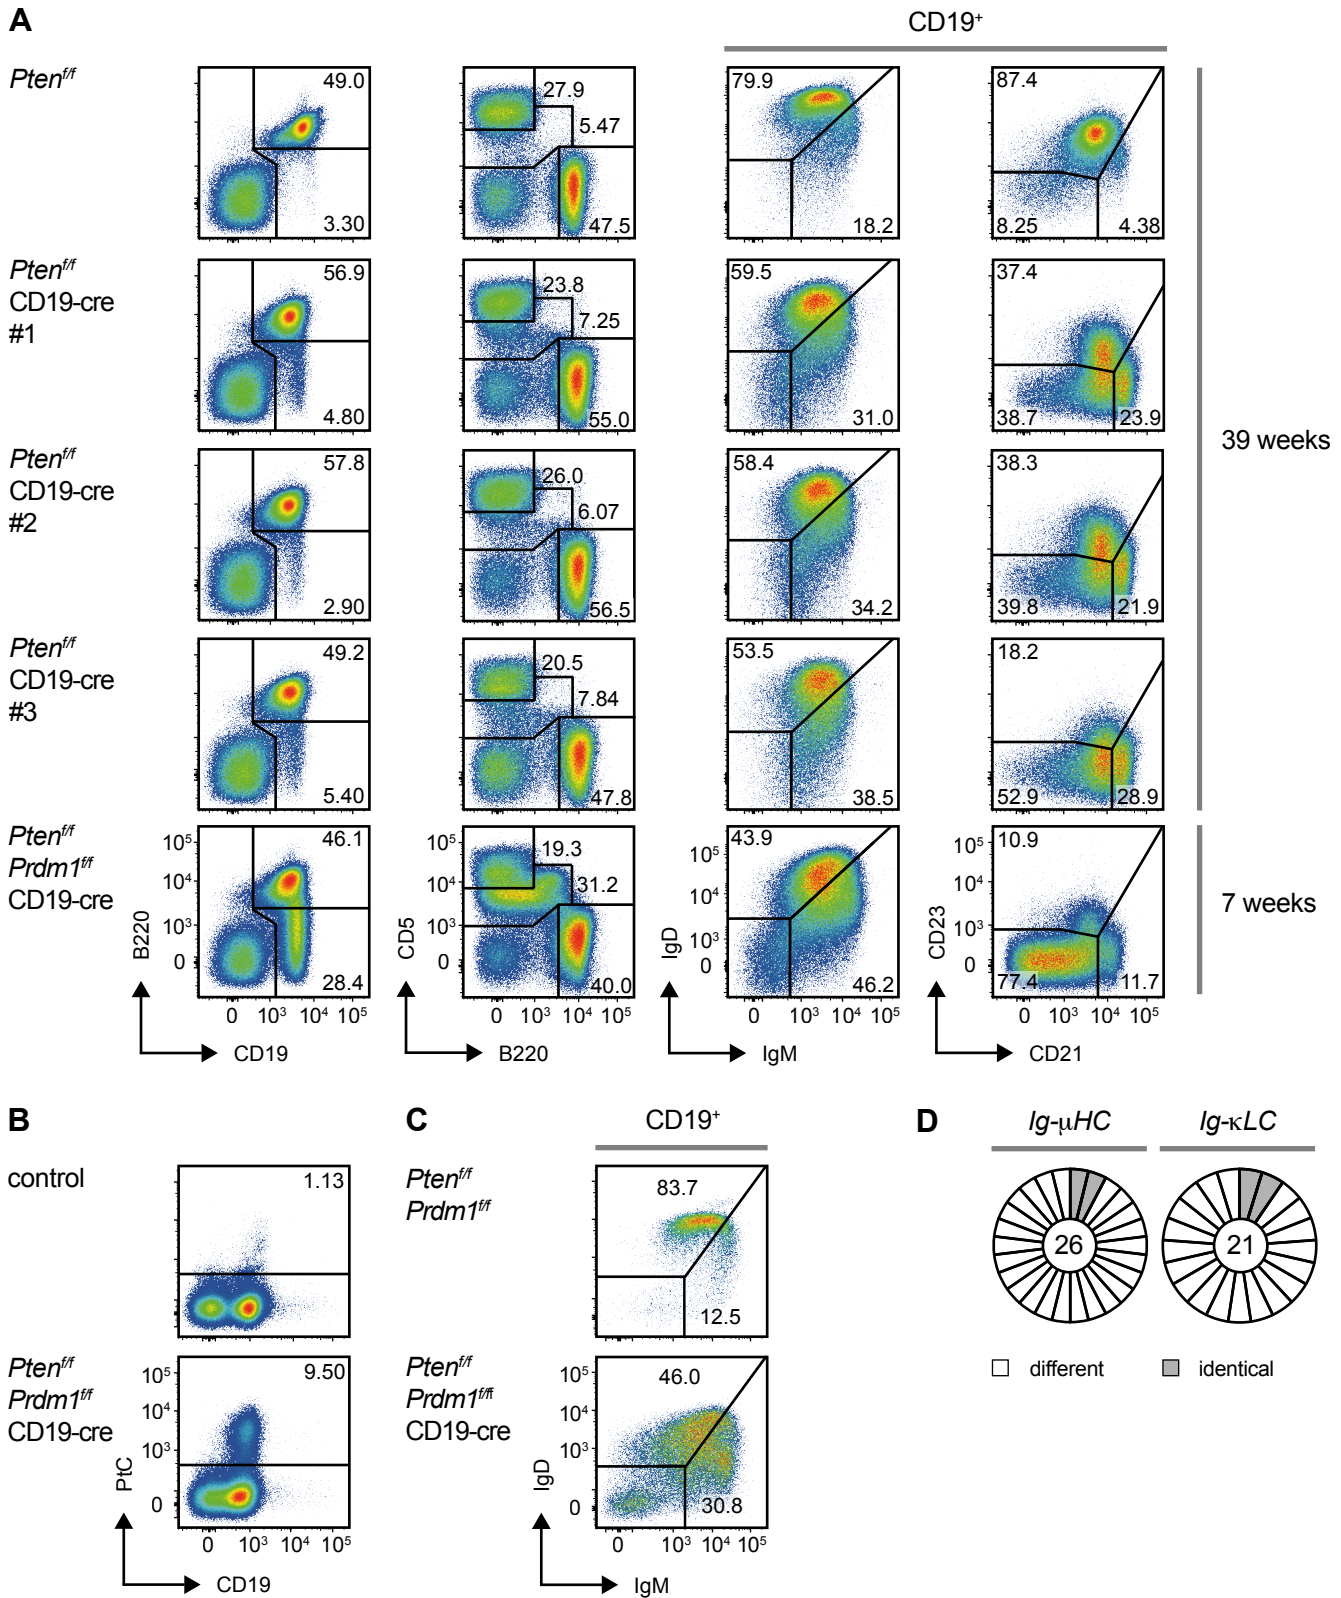

**Figure S5 | Premature Terminal Differentiation Prevents Uncontrolled Proliferation** (related to Fig. 5)

**A** | Splenic B cell subpopulations from *Pten<sup>fl/fl</sup>*, *Pten<sup>fl/fl</sup> x CD19-cre* (both sacrificed at the age of 39 weeks) and *Pten<sup>fl/fl</sup> x Prdm1<sup>fl/fl</sup> x CD19-cre* (7 weeks) were compared by flow cytometry.

**B** | Splenocytes from control and *Pten<sup>fl/fl</sup> x Prdm1<sup>fl/fl</sup> x CD19-cre* mice were analyzed by flow cytometry for surface expression of CD19 and reactivity to phosphatidylcholine (PtC).

**C** | Peripheral blood from *Pten<sup>fl/fl</sup> x Prdm1<sup>fl/fl</sup>* and *Pten<sup>fl/fl</sup> x Prdm1<sup>fl/fl</sup> x CD19-cre* mice was analyzed by flow cytometry for BCR expression (IgM/IgD).

**D** | Analysis of V(D)J gene segment usage in CD19<sup>+</sup>/CD5<sup>+</sup> B cells from *Pten<sup>fl/fl</sup> x Prdm1<sup>fl/fl</sup> x CD19-cre* mice (n=2). The V(D)J segments from *Ig-μHC* and *Ig-κLC* were cloned from cDNA, sequenced and the frequency of identical combinations was analyzed to assess the BCR clonality of the respective cells in these mice. For further details see also Table S7.

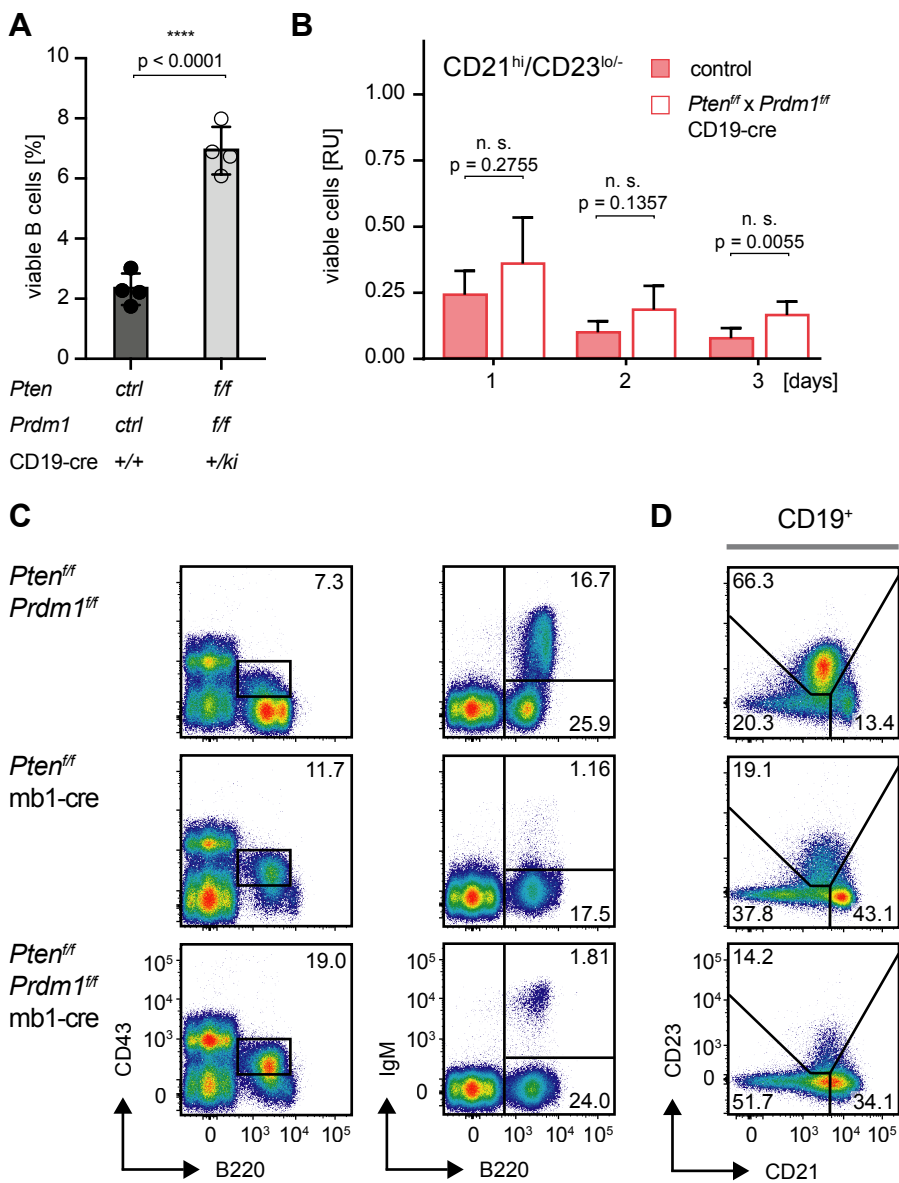

**Figure S6 | Reconstitution of Blimp-1 Activates Terminal Differentiation**  
(related to Fig. 6)

**A** | Splenocytes from control and *Pten*<sup>f/f</sup> x *Prdm1*<sup>f/f</sup> x CD19-cre mice were treated with 2.5 µg/ml LPS. The percentages of viable cells were assessed at 7 days post stimulation by morphology and staining with viability dye, α-CD19 and α-B220 (n=4, mean ±SD).

**B** | MZ.B cells (CD21<sup>hi</sup>/CD23<sup>lo/-</sup>) from mice of the indicated genotypes were FACS-purified and cultured *in vitro*. The percentages of viable cells were monitored over a time period of 3 days and assessed by morphology and staining with viability dye. Percentages of viable cells at each timepoint were normalized to the percentages of viable cells measured at day 0 in the respective sample (n=4, mean, ±SD).

**C, D** | Freshly isolated bone marrow (**C**) and splenocytes (**D**) from *Pten*<sup>f/f</sup> x *Prdm1*<sup>f/f</sup> and *Pten*<sup>f/f</sup> x *Prdm1*<sup>f/f</sup> x mb1-cre mice were analyzed by flow cytometry for surface expression of the indicated markers. Data are representative of 2 individual mice sacrificed and analyzed at the age of 10 and 17 weeks, respectively.

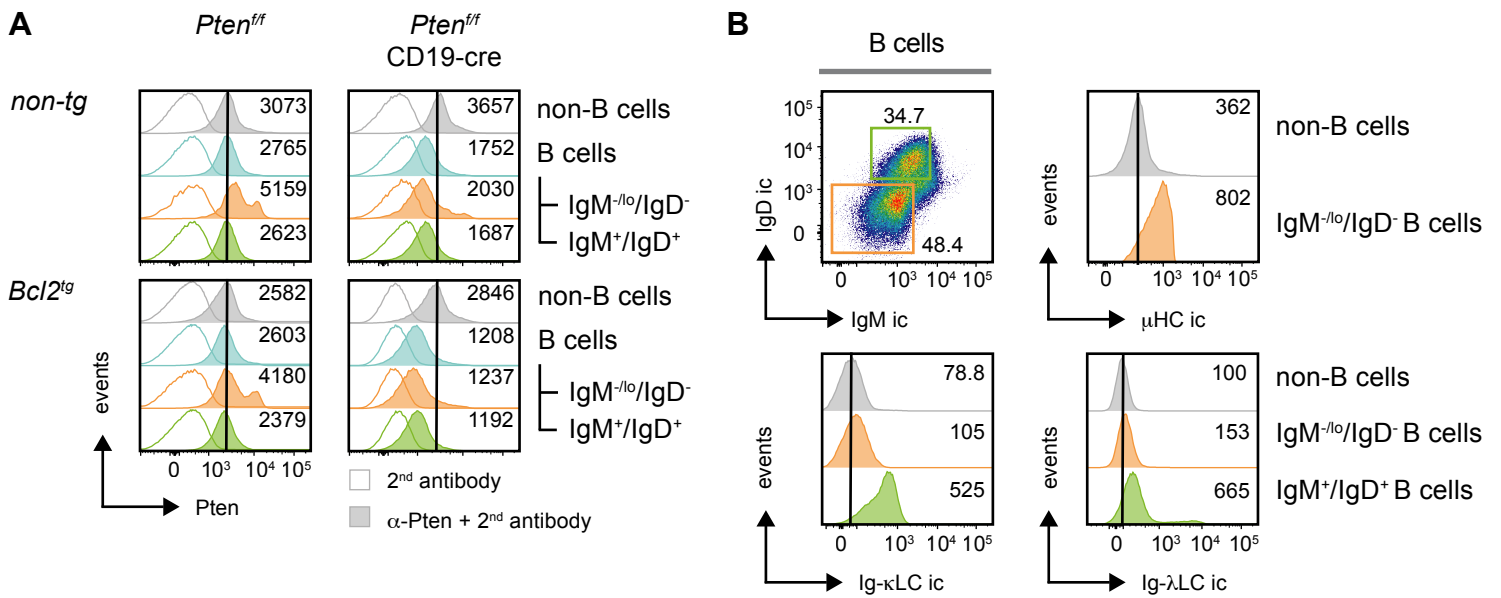

**Figure S7 | Characterization of the IgM<sup>-lo</sup>/IgD<sup>-</sup> Population in *Pten<sup>fl/fl</sup>* x CD19-cre x *Bcl2<sup>tg</sup>* Mice (related to Fig. 7)**

**A** | Splenocytes from mice of the indicated genotypes were stained intracellularly for Pten following surface staining for CD19, B220, IgM and IgD. Pten deletion was compared in the populations of non-B cells (CD19<sup>-</sup>/B220<sup>-</sup>), total B cells (CD19<sup>+</sup>/B220<sup>+</sup>), BCR<sup>+</sup> (CD19<sup>+</sup>/B220<sup>+</sup>/IgM<sup>+</sup>/IgD<sup>+</sup>) and BCR<sup>-lo</sup> (CD19<sup>+</sup>/B220<sup>+</sup>/IgM<sup>-lo</sup>/IgD<sup>-</sup>) B cells.

**B** | *Pten<sup>fl/fl</sup>* x CD19-cre x *Bcl2<sup>tg</sup>*-derived splenocytes were stained at the surface for expression of CD19 and B220, subsequently fixed, permeabilized and stained intracellularly (ic) for IgM, IgD, Ig-κ- and Ig-λLC. Intracellular Ig-μHC expression in the IgM<sup>-lo</sup>/IgD<sup>-</sup> population was compared to expression in the non-B cell fraction (CD19<sup>-</sup>/B220<sup>-</sup>). Intracellular Ig-κ- and Ig-λLC expression in the IgM<sup>-lo</sup>/IgD<sup>-</sup> population was compared to the expression in the IgM<sup>+</sup>/IgD<sup>+</sup> B cell and the non-B cell fraction (CD19<sup>-</sup>/B220<sup>-</sup>).



## Supplemental Experimental Procedures

### Tamoxifen Administration

For inducible deletion of *Prdm1*, *Prdm1<sup>fl/fl</sup>* mice were intercrossed with mb1-cre-ER<sup>T2</sup> mice (Hobeika et al., 2015) and treated by gavage 3x every second day with 6 mg tamoxifen (Ratiopharm) dissolved in 20% ClinOleic (Baxter). Inducible deletion of *Prdm1* *in vivo* was performed in compliance with animal research permit #1288 at the regional board of Tübingen, Germany). Mice were sacrificed and analyzed 6 months after induction with tamoxifen.

**Table S1** | Antibodies used in flow cytometric analyses (related to Experimental Procedures)

| Antigen      | Conjugate                     | Clone       | Company                   |
|--------------|-------------------------------|-------------|---------------------------|
| CD5          | eFluor 450 or PE              | 53-7.3      | eBioscience               |
| CD19         | PerCP-Cy5.5                   | 1D3         | BD Biosciences            |
| CD19         | eFluor 450 or APC             | eBio1D3     | eBioscience               |
| CD21/CD35    | APC or PE-Cy7                 | 7E9         | BioLegend                 |
| CD23         | PE or Biotin                  | B3B4        | BD Biosciences            |
| CD25         | APC                           | PC61        | BD Biosciences            |
| CD43         | FITC                          | S7          | BD Biosciences            |
| CD45R (B220) | PE-Cy7 or<br>PerCP-eFluor 710 | RA3-642     | eBioscience               |
| CD138        | PE                            | DL-101      | eBioscience               |
| CD138        | Brilliant Violet 421          | 281-2       | BioLegend                 |
| IgD          | FITC, PE or Biotin            | 11-26       | SouthernBiotech           |
| IgD          | APC                           | 11-26       | eBioscience               |
| IgM          | FITC                          | polyclonal  | SouthernBiotech           |
| IgM          | eFluor 450                    | eB121-15-F9 | eBioscience               |
| IgM          | Cy5                           | polyclonal  | Jackson<br>ImmunoResearch |
| Bcl2         | PE                            | Bcl-2/100   | BD Biosciences            |

|               |                          |                         |                |
|---------------|--------------------------|-------------------------|----------------|
| Bcl6          | Alexa Fluor 647          | K112-91                 | BD Biosciences |
| Blimp-1       | Alexa Fluor 647          | 5E7                     | BioLegend      |
| Irf4          | eFluor 660               | 3E4                     | eBioscience    |
| pS6           | PE or<br>PerCP-eFluor710 | cupk43k                 | eBioscience    |
| Pten          | unlabeled                | 138G6                   | Cell Signaling |
| Foxo1         | unlabeled                | C29H4                   | Cell Signaling |
| Isotype ctrl. | Alexa Fluor 647<br>or PE | MOPC-173 and<br>MOPC-21 | BioLegend      |
| Isotype ctrl. | eFluor 660               | eB149/10H5              | eBioscience    |

**Table S2** | Fixation and permeabilization kits used for intracellular flow cytometry (related to Experimental Procedures)

| Antigen                      | Kit                                               | Company        |
|------------------------------|---------------------------------------------------|----------------|
| Bcl2, Foxo1, Pten<br>and BCR | Fix and perm cell permeabilization kit            | ADG            |
| Bcl6                         | Foxp3 Staining Buffer Set                         | eBioscience    |
| Blimp-1 and Irf4             | True-Nuclear Transcription Buffer<br>Staining Set | BioLegend      |
| pS6                          | Cytofix/Cytoperm Kit                              | BD Biosciences |

**Table S3** | Antibodies used for immunoblotting (related to Experimental Procedures)

| Antigen | origin | Clone      | Company        |
|---------|--------|------------|----------------|
| Blimp-1 | rabbit | C14A1      | Cell Signaling |
| Bach2   | rabbit | polyclonal | Rockland       |
| Irf4    | rabbit |            | abcam          |
| Irf8    | rabbit | D20D8      | Cell Signaling |
| Foxo1   | rabbit | C29H4      | Cell Signaling |
| pS6     | rabbit | D57.2.2E   | Cell Signaling |
| Gapdh   | rabbit | D16H11     | Cell Signaling |

**Table S4** | Antibodies used for immunohistochemistry (related to Experimental Procedures)

| Antigen | Conjugate | Clone      | Company                |
|---------|-----------|------------|------------------------|
| CD169   | FITC      | MOMA-1     | AbD serotec            |
| CD90.2  | PE        | 53-2.1     | BD Biosciences         |
| IgM     | Cy5       | polyclonal | Jackson Immunoresearch |

**Table S5** | TaqMan-Probe mixes used for qPCR analyses

(related to Experimental Procedures)

TaqMan-Probe mixes

|              |               |
|--------------|---------------|
| <i>Prdm1</i> | Mm00476128_m1 |
| <i>Bcl2</i>  | Mm00477631_m1 |
| <i>Gapdh</i> | Mm99999915_g1 |

## RACE

Total RNA was isolated from sorted cells and cDNA was synthesized as described in the main experimental procedures section concerning quantitative RT-PCR. A poly G-tail was added to the 3' end of the first strand cDNA using dGTP and TdT (New England Biolabs). *Ig- $\mu$ HC*-specific and *Ig- $\kappa$ LC*-specific transcripts were amplified by nested PCR using gene-specific oligos, anchor/adaptor oligos (enlisted in Table S6) and Q5 polymerase (New England Biolabs). The amplified PCR-products were subcloned in pJET1.2 blunt/vector (CloneJET PCR Cloning Kit, Thermo Fisher) and colonies were sequenced (GATC). Sequences were analyzed by using the ImMunoGeneTics information system IMGT/V-Quest online tool.

**Table S6** | Primers used for *Ig* gene RACE (related to Experimental Procedures)

*Ig-μHC* amplification

| Primers 1st PCR |         | Sequence 5' → 3'                          |
|-----------------|---------|-------------------------------------------|
| BaPpc           | Anchor  | CTC TGC AGG ATC CAC GAC CCC CCC CCC CCC C |
| mmuSP2          |         | GAC CAG ACA GGT CAG GTT AGC GGA CTT GCT   |
| Primers 2nd PCR |         | Sequence 5' → 3'                          |
| BaP             | Adaptor | TCT GCA GGA TCC ACG ACC                   |
| mmuSP3          |         | GAT GAC TTC AGT GTT GTT CTG GTA GTT CCA   |

*Ig-κHC* amplification

| Primers 1st PCR |         | Sequence 5' → 3'                          |
|-----------------|---------|-------------------------------------------|
| BaPpc           | Anchor  | CTC TGC AGG ATC CAC GAC CCC CCC CCC CCC C |
| mK-SP2          |         | TGA AGT TGA TGT CTT GTG AGT GGC CTC       |
| Primers 2nd PCR |         | Sequence 5' → 3'                          |
| BaP             | Adaptor | TCT GCA GGA TCC ACG ACC                   |
| mK-SP1          |         | TCA AGA AGC ACA CGA CTG AGG               |

**Table S7 | Ig gene RACE sequencing results (related to Fig. 5 and Fig. S5D)**

**Ig-μHC**

| # 5462 DKO CD19 <sup>+</sup> CD5 <sup>+</sup> |                   |                   |                   |                   |        |
|-----------------------------------------------|-------------------|-------------------|-------------------|-------------------|--------|
| Clone N.                                      | V-GENE and allele | J-GENE and allele | D-GENE and allele | HCDR3             | Length |
| C 16                                          | IGHV1-12*01 F     | IGHJ2*01 F        | IGHD2-3*01 F      | CARDVHFYDW        | 8      |
| C 17                                          | IGHV1-59*01 F     | IGHJ3*01 F        | IGHD2-3*01 F      | CAREGDGYAYW       | 9      |
| C 21                                          | IGHV5-17*01 F     | IGHJ4*01 F        | IGHD2-14*01 F     | CARQYRAMDYW       | 9      |
| C 22                                          | IGHV5-17*01 F     | IGHJ4*01 F        | IGHD2-14*01 F     | CARPRYHTMDYW      | 10     |
| C 23                                          | IGHV1-72*01 F     | IGHJ2*01 F        | IGHD2-10*02 F     | CAYGNYVYFDYW      | 11     |
| C 24                                          | IGHV1-77*01 F     | IGHJ3*01 F        | IGHD2-2*01 F      | CARGGGYVLFAYW     | 11     |
| C 25                                          | IGHV11-2*01 F     | IGHJ1*03 F        | IGHD1-1*01 F      | CMRYGSSYWFYFDVW   | 12     |
| C 26                                          | IGHV9-3*01 F      | IGHJ3*01 F        | IGHD2-3*01 F      | CARPDGYLFAYW      | 10     |
| C 27                                          | IGHV1-75*01 F     | IGHJ3*01 F        | IGHD3-3*01 F      | CARGGTGFAYW       | 9      |
| C 28                                          | IGHV6-6*01 F      | IGHJ2*01 F        | IGHD1-1*01 F      | CTRHYGSSYFDYW     | 12     |
| C 29                                          | IGHV9-4*01 F      | IGHJ3*01 F        | IGHD1-1*01 F      | CARSYYYGSSYSWFAYW | 15     |
| C 30                                          | IGHV1-50*01 F     | IGHJ2*01 F        | IGHD1-1*02 F      | CARGDYFDYW        | 8      |

| # 5464 DKO CD19 <sup>+</sup> CD5 <sup>+</sup> |                   |                   |                   |                  |        |
|-----------------------------------------------|-------------------|-------------------|-------------------|------------------|--------|
|                                               | V-GENE and allele | J-GENE and allele | D-GENE and allele | HCDR3            | Length |
| C 44                                          | IGHV5-9-1*02 F    | IGHJ4*01 F        | IGHD2-3*01 F      | CTRDDDDGYFYAMDYW | 15     |
| C 45                                          | IGHV8-8*01 F      | IGHJ2*01 F        | IGHD2-10*01 F     | CARTPYGRGFDYW    | 12     |
| C 46                                          | IGHV9-3*01 F      | IGHJ4*01 F        | IGHD2-2*01 F      | CARTTTDTAMDYW    | 11     |
| C 47                                          | IGHV1-19*01 F     | IGHJ1*03 F        | IGHD2-1*01 F      | CARVYGNWYFDVW    | 11     |
| C 48                                          | IGHV9-3*01 F      | IGHJ2*01 F        | IGHD3-3*01 F      | CARIGGLYFDYW     | 11     |
| C 49                                          | IGHV2-9-1*01 F    | IGHJ3*01 F        | IGHD2-2*01 F      | CARYGYDGGPWFAFW  | 13     |
| C 50                                          | IGHV1-19*01 F     | IGHJ3*01 F        | IGHD1-1*02 F      | CGGGNYGWFAFW     | 10     |
| C 51                                          | IGHV1-63*01 F     | IGHJ3*01 F        | IGHD3-1*01 F      | CARGLTWFAFW      | 9      |
| C 52                                          | IGHV5-6*01 F      | IGHJ1*03 F        | IGHD2-4*01 F      | CARPLYDYDYWYFDVW | 14     |
| C 53                                          | IGHV1-55*01 F     | IGHJ2*01 F        | no                | CARRDYW          | 5      |
| C 54                                          | IGHV5-17*01 F     | IGHJ1*03 F        | IGHD2-3*01 F      | CARCYRYFDVW      | 10     |
| C 55                                          | IGHV1-19*01 F     | IGHJ2*01 F        | IGHD2-4*01 F      | CARGLDYDGGYW     | 10     |
| C 56                                          | IGHV11-2*01 F     | IGHJ1*03 F        | IGHD2-1*01 F      | CMRYGNWYFDVW     | 11     |
| C 57                                          | IGHV9-3*01 F      | IGHJ2*01 F (a)    | IGHD6-3*01 F      | CARDSTVDYW       | 8      |

**Ig-κLC**

| # 5462 DKO CD19 <sup>+</sup> CD5 <sup>+</sup> |                   |                   |  |             |        |
|-----------------------------------------------|-------------------|-------------------|--|-------------|--------|
| Clone N.                                      | V-GENE and allele | J-GENE and allele |  | LCDR3       | Length |
| C 2                                           | IGKV8-27*01 F     | IGKJ5*01 F        |  | CHQYLSSLTF  | 8      |
| C 10                                          | IGKV3-10*01 F     | IGKJ2*01 F        |  | CQQNNEPYTF  | 9      |
| C 11                                          | IGKV8-16*01 F     | IGKJ2*01 F        |  | CQQHLHIPYTF | 9      |
| C 12                                          | IGKV17-121*01 F   | IGKJ5*01 F        |  | CLQSDNPLTF  | 9      |
| C 14                                          | IGKV14-126*01 F   | IGKJ4*01 F        |  | CLQHGESPTTF | 9      |
| C 19                                          | IGKV14-126*01 F   | IGKJ1*01 F        |  | CLQHGESPWTF | 9      |
| C 26                                          | IGKV12-44*01 F    | IGKJ2*01 F        |  | CQHHYGTPTTF | 9      |
| C 29                                          | IGKV4-91*01 F     | IGKJ5*01 F        |  | CQQGSSIPLTF | 9      |
| C 31                                          | IGKV8-16*01 F     | IGKJ4*01 F        |  | CQQHLHIPYTF | 9      |

| # 5464 DKO CD19 <sup>+</sup> CD5 <sup>+</sup> |                   |                   |  |             |        |
|-----------------------------------------------|-------------------|-------------------|--|-------------|--------|
|                                               | V-GENE and allele | J-GENE and allele |  | LCDR3       | Length |
| C 3                                           | IGKV5-39*01 F     | IGKJ5*01 F        |  | CQNGHSFPLTF | 9      |
| C 5                                           | IGKV8-24*01 F     | IGKJ1*01 F        |  | CQQHYSTPRTF | 9      |
| C 6                                           | IGKV4-91*01 F     | IGKJ5*01 F        |  | CQQGSSIPLTF | 9      |
| C 7                                           | IGKV5-39*01 F     | IGKJ4*01 F        |  | CQNGHSFPPTF | 9      |
| C 9                                           | IGKV4-59*01 F     | IGKJ2*01 F        |  | CQQWSSYPYTF | 9      |
| C 12                                          | IGKV5-39*01 F     | IGKJ2*01 F        |  | CQNGHSFPYTF | 9      |
| C 16                                          | IGKV14-126*01 F   | IGKJ2*01 F        |  | CLQHGESPYTF | 9      |
| C 19                                          | IGKV12-44*01 F    | IGKJ2*01 F        |  | CQHHYGTPTTF | 9      |
| C 20                                          | IGKV8-21*01 F     | IGKJ1*01 F        |  | CKQSYNLPWTF | 9      |
| C 23                                          | IGKV5-39*01 F     | IGKJ2*01 F        |  | CQNGHSFPYTF | 9      |
| C 25                                          | IGKV8-21*01 F     | IGKJ1*01 F        |  | CKQSYNLPWTF | 9      |
| C 27                                          | IGKV19-93*01 F    | IGKJ1*01 F        |  | CLQYDNLWTF  | 8      |

Identical V(D)J segments are marked in grey

## **Supplemental references**

Hobeika, E., Levit-Zerdoun, E., Anastasopoulou, V., Pohlmeier, R., Altmeier, S., Alsadeq, A., Dobenecker, M.W., Pelanda, R., and Reth, M. (2015). CD19 and BAFF-R can signal to promote B-cell survival in the absence of Syk. *EMBO J* 34, 925-939.
